# Supplementary material
Source: HighWire-hosted journal article supplement (https://spcare.bmj.com/content/14/e1/e1096)

**Appendix :**

Appendix, Table A1: Baseline characteristics of patients lost to follow-up

|                                                               | Total              |      | Survival           |      | Lost to follow-up  |      | p     |
|---------------------------------------------------------------|--------------------|------|--------------------|------|--------------------|------|-------|
|                                                               | Number of patients | %    | Number of patients | %    | Number of patients | %    |       |
| <b>Sex</b>                                                    |                    |      |                    |      |                    |      |       |
| Men                                                           | 410                | 40.8 | 407                | 40.9 | 3                  | 33.3 |       |
| Women                                                         | 595                | 59.2 | 589                | 59.1 | 6                  | 66.7 | 0.745 |
| <b>Age, mean (standard-deviation)</b>                         | 87.1<br>(6.6)      |      | 87.4<br>(9.2)      |      | 87.1<br>(6.7)      |      | 0.862 |
| <b>Nursing home</b>                                           | 191                | 19   | 191                | 19.2 | 0                  | 0    | 0.221 |
| <b>Smoking</b>                                                | 154                | 15.3 | 153                | 15.4 | 1                  | 11.1 |       |
| Unknown                                                       | 810                | 80.6 | 803                | 80.6 | 7                  | 77.8 | 0.424 |
| <b>Dyslipidemia</b>                                           | 169                | 16.8 | 168                | 16.9 | 1                  | 11.1 | 1.000 |
| <b>Diabetes</b>                                               | 271                | 27   | 269                | 27   | 2                  | 22.2 | 1.000 |
| <b>Ongoing disease</b>                                        | 570                | 56.7 | 566                | 56.8 | 4                  | 44.4 |       |
| Unknown                                                       | 24                 | 2.4  | 23                 | 2.3  | 1                  | 11.1 | 0.218 |
| <b>Cognition</b>                                              | 260                | 25.9 | 255                | 25.6 | 5                  | 55.6 | 0.055 |
| <b>Recent hospitalization</b>                                 | 249                | 24.8 | 247                | 24.8 | 2                  | 22.2 | 1.000 |
| <b>More than 2 hospitalizations in an intensive care unit</b> | 4                  | 0.4  | 4                  | 0.4  | 0                  | 0    | 1.000 |
| <b>Frailty</b>                                                | 464                | 46.2 | 459                | 46.1 | 5                  | 55.6 |       |
| Unknown                                                       | 275                | 27.4 | 272                | 27.3 | 3                  | 33.3 | 0.690 |

p, p-value exact Fischer test

Appendix, Table A2: Bivariate analysis of predictive risk factors of short-term mortality

|                                 | <b>Beta coefficient</b> | <b>OR</b> | <b>OR 95% CI</b> | <b>p</b> |
|---------------------------------|-------------------------|-----------|------------------|----------|
| <b>Male</b>                     | 0.7187                  | 2.05      | 1.12-3.77        | 0.020    |
| <b>Age</b>                      | 0.0489                  | 1.05      | 1.00-1.10        | 0.056    |
| <b>Nursing home residency</b>   | 0.8453                  | 2.33      | 1.04-5.23        | 0.040    |
| <b>Weight loss</b>              | 1.0134                  | 2.75      | 1.49-5.11        | 0.001    |
| <b>Self-reported exhaustion</b> | 1.0712                  | 2.92      | 1.41-6.04        | 0.004    |

Appendix, Table A3: Sensitivity, specificity, positive predictive value (PPV), negative predictive value (NPV) and 95% confidence intervals at different risk score cut-off points.

| Risk score cut point | Sensitivity | Specificity | Positive predictive value | Negative predictive value | False positive rate |
|----------------------|-------------|-------------|---------------------------|---------------------------|---------------------|
| ≥ 0                  | 1           | 0           | -                         | -                         | 1                   |
| ≥ 3                  | 0.98        | 0.06        | 0.12                      | 0.96                      | 0.94                |
| ≥ 4                  | 0.98        | 0.14        | 0.12                      | 0.98                      | 0.86                |
| ≥ 5                  | 0.98        | 0.14        | 0.13                      | 0.98                      | 0.86                |
| ≥ 6                  | 0.96        | 0.25        | 0.14                      | 0.98                      | 0.75                |
| ≥ 7                  | 0.92        | 0.35        | 0.16                      | 0.97                      | 0.65                |
| ≥ 8                  | 0.92        | 0.36        | 0.16                      | 0.97                      | 0.64                |
| ≥ 9                  | 0.88        | 0.43        | 0.17                      | 0.96                      | 0.57                |
| ≥ 10                 | 0.81        | 0.51        | 0.18                      | 0.95                      | 0.49                |
| ≥ 11                 | 0.73        | 0.58        | 0.19                      | 0.94                      | 0.42                |
| ≥ 12                 | 0.58        | 0.74        | 0.23                      | 0.93                      | 0.26                |
| ≥ 13                 | 0.58        | 0.75        | 0.24                      | 0.93                      | 0.25                |
| ≥ 14                 | 0.54        | 0.78        | 0.24                      | 0.93                      | 0.22                |
| ≥ 15                 | 0.46        | 0.83        | 0.26                      | 0.92                      | 0.17                |
| ≥ 16                 | 0.31        | 0.93        | 0.37                      | 0.91                      | 0.07                |
| ≥ 17                 | 0.21        | 0.97        | 0.48                      | 0.90                      | 0.03                |
| ≥ 18                 | 0.19        | 0.97        | 0.45                      | 0.90                      | 0.03                |
| ≥ 19                 | 0.10        | 0.98        | 0.39                      | 0.89                      | 0.02                |
| ≥ 20                 | 0.10        | 0.99        | 0.50                      | 0.89                      | 0.01                |
| ≥ 23                 | 0.02        | 0.99        | 0.33                      | 0.89                      | 0.01                |
| ≥ 25                 | 0           | 0.99        | 0.00                      | 0.88                      | 0.01                |
| > 25                 | 0           | 1           | -                         | -                         | 0                   |

Appendix, Figure A1: Proportions of observed and predicted deaths (Derivation cohort)

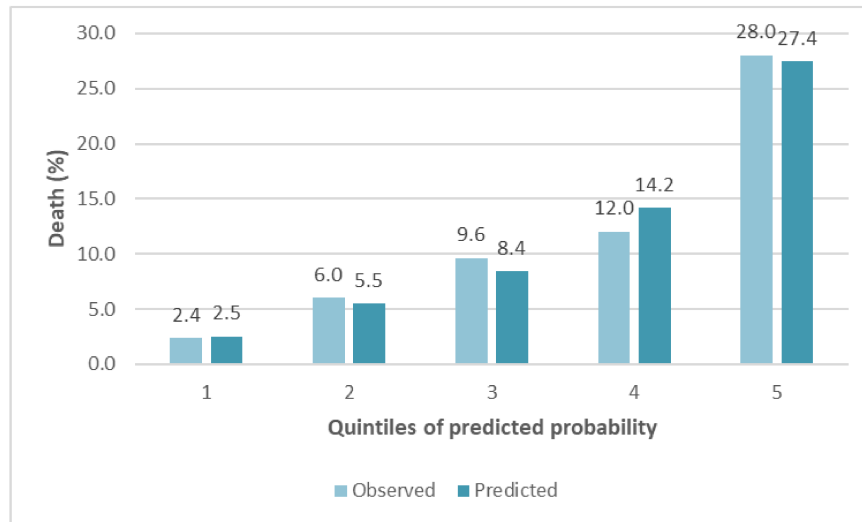

Appendix, Figure A2. Prediction of short-term mortality with WHALES Score

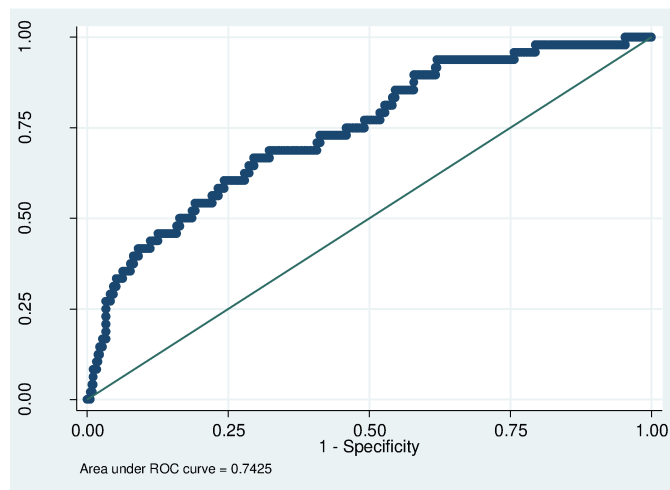

Appendix, Figure A3. Receiver operating characteristic curve for the performance of short-term mortality risk score

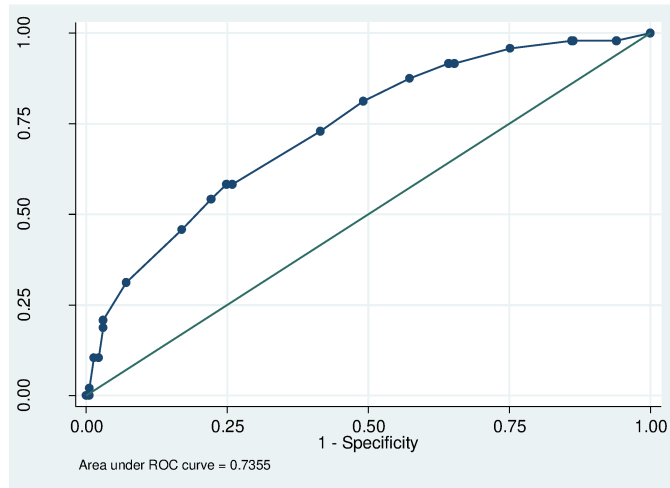

Figure A4. Proportion of observed and predicted deaths according to the mortality risk score (Validated cohort)

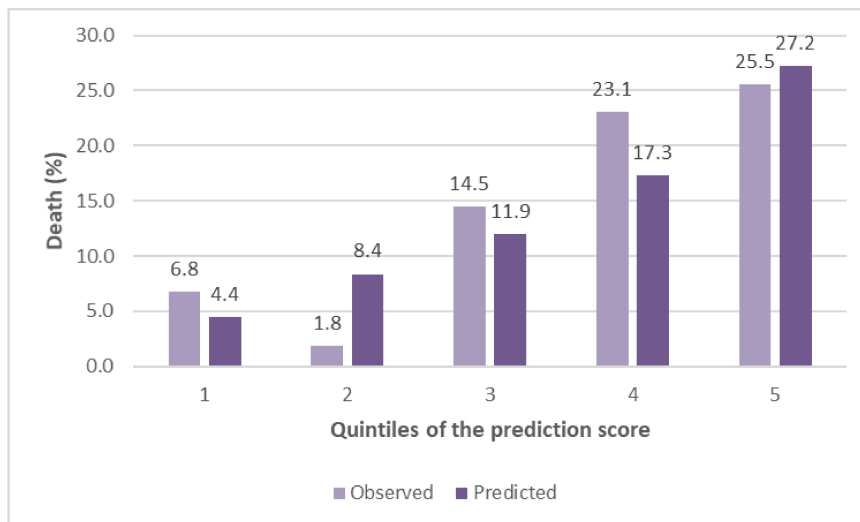

Supplement: inline-supplementary-material-1 [file inline-supplementary-material-1.pdf]
